# Supplementary material for: Cosuppression of the chloroplast localized molecular chaperone HSP90.5 impairs plant development and chloroplast biogenesis in Arabidopsis
Source: PubMed Central journal article supplement (PMC4168064; doi:10.1186/1756-0500-7-643), 2014-09-13
Supplement: 13104_2014_3160_MOESM1_ESM.pdf [file 13104_2014_3160_MOESM1_ESM.pdf]

Table S1 Primers used in this work

| Name                         | Sequence (5' to 3')                                                                              | Purpose                                                                                                                                         |
|------------------------------|--------------------------------------------------------------------------------------------------|-------------------------------------------------------------------------------------------------------------------------------------------------|
| HSP90.5GWF <sub>Full</sub> F | GGGGACAAGTTTGTACAAAAAAGC<br>AGGCTCCATGGCTCCTGCTTTGAGTAGAAGT                                      | Used to amplify the AtHSP90.5 full length cDNA for BP reaction to generate entry vector. The underlined represent the FLAG-tag coding sequence. |
| HSP90.5GWF <sub>Full</sub> R | GGGGACCACTTTGTACAAGAAAGCTGGGTTT <u>ACTTGTCATC</u><br><u>ATCGTCCTTATAGTCATCTTGCCAAGGATCACTCTC</u> |                                                                                                                                                 |
| HSP90.5K478F                 | CAAGAAATCTCTGAGAGTGAA                                                                            | Transgene detection                                                                                                                             |
| HSP90.5K625R                 | TTGCAACTTTGTCACCGAGC                                                                             |                                                                                                                                                 |
| HSP90.5D62F                  | GCAACCATGGACGCCCGCTGGCGGAG                                                                       | Clone C-terminally FLAG-tagged and non-tagged mature form (D62-D780) into pProEXHTb vector                                                      |
| HSP90.5D780FLAG<br>R         | CCGTTCTAGATTACTTGTTCATCATCGTCCTT                                                                 |                                                                                                                                                 |
| HSP90.5D780R                 | CCGTTCTAGATCAATCTTGCCAAGGATCACTCTC                                                               |                                                                                                                                                 |
| HSP90.5-qF                   | GTGGATTCACCTCTGATAGC                                                                             | Forward primer for qPCR                                                                                                                         |
| HSP90.5-qEndo-R              | CACTGCAAACAAAAGAAGG                                                                              | Reverse primer for endogenous gene (3' UTR) for qPCR                                                                                            |
| HSP90.5-qTotal-R             | GCCAAGGATCACTCTCTGCC                                                                             | Reverse primer for both endogenous and transgene for qPCR                                                                                       |
| ACTIN7F                      | TCACAGAGGCACCTCTTAACC                                                                            | Reference gene for qPCR                                                                                                                         |
| ACTIN7R                      | CCCTCGTAGATTGGCACAG                                                                              |                                                                                                                                                 |

Figure S1

At2G04030.1 (CR88, HSP90.5)

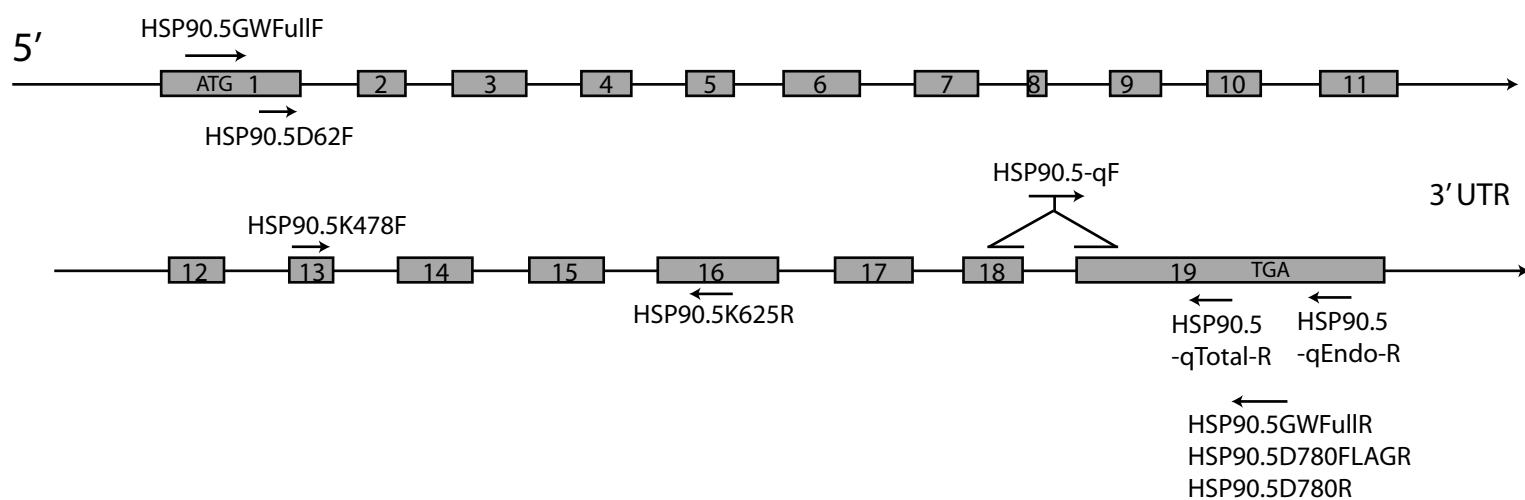

Figure S1. The Arabidopsis HSP90.5 gene structure with relative positions of primers used for this study. The numbered boxes represent exons. The relative positions of translation initiation codon ATG and stop codon TGA are also labelled.

Figure S2

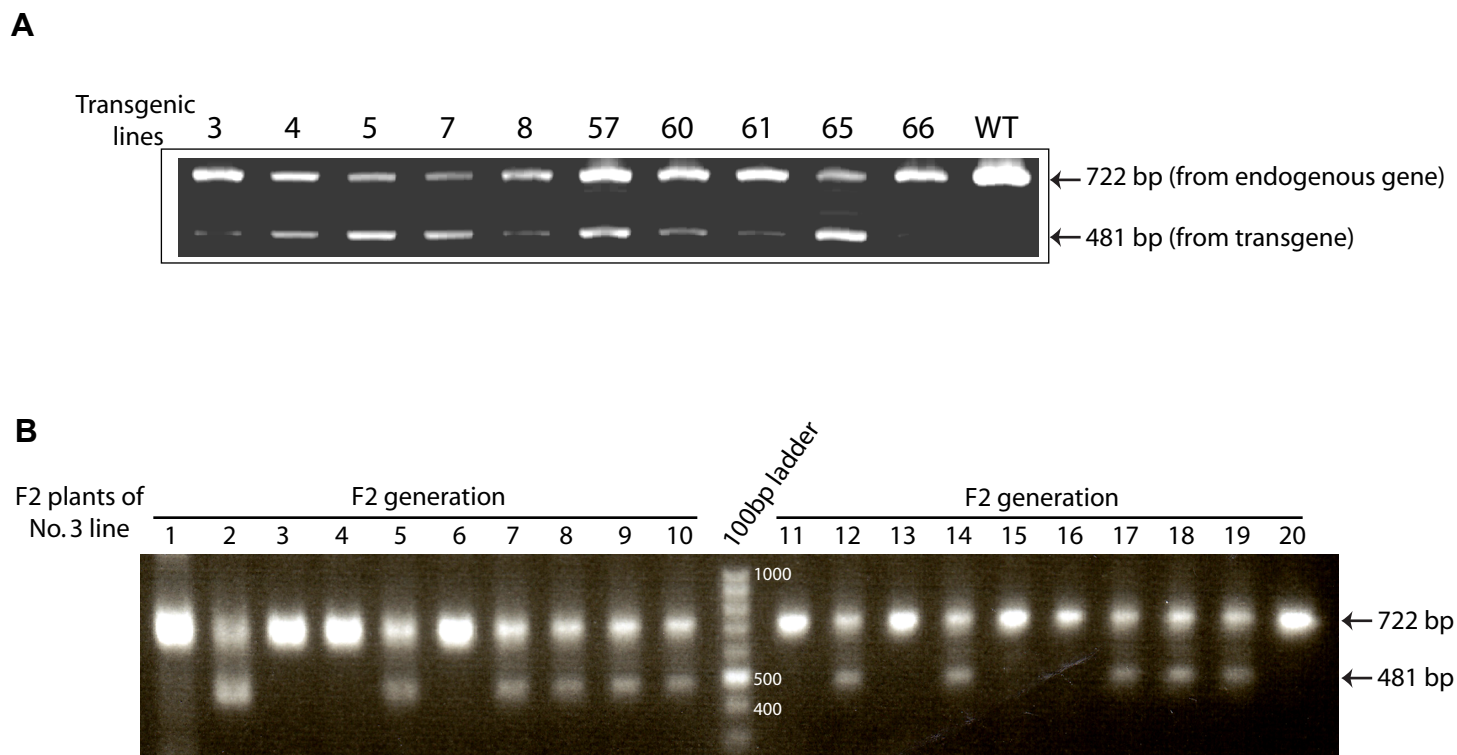

Figure S2. PCR amplification of transgene fragments from Arabidopsis genomic DNA to genotype transgenic plants. A, A typical PCR analysis for primary transgenic plants. B, A typical PCR analysis of the F2 generation plants from backcrossed heterozygous transgenic lines. PCR amplification using HSP90.5K478F and HSP90.5K625R produced a 722bp fragment from endogenous HSP90.5 gene and a 481bp fragment from transgene.

Figure S3

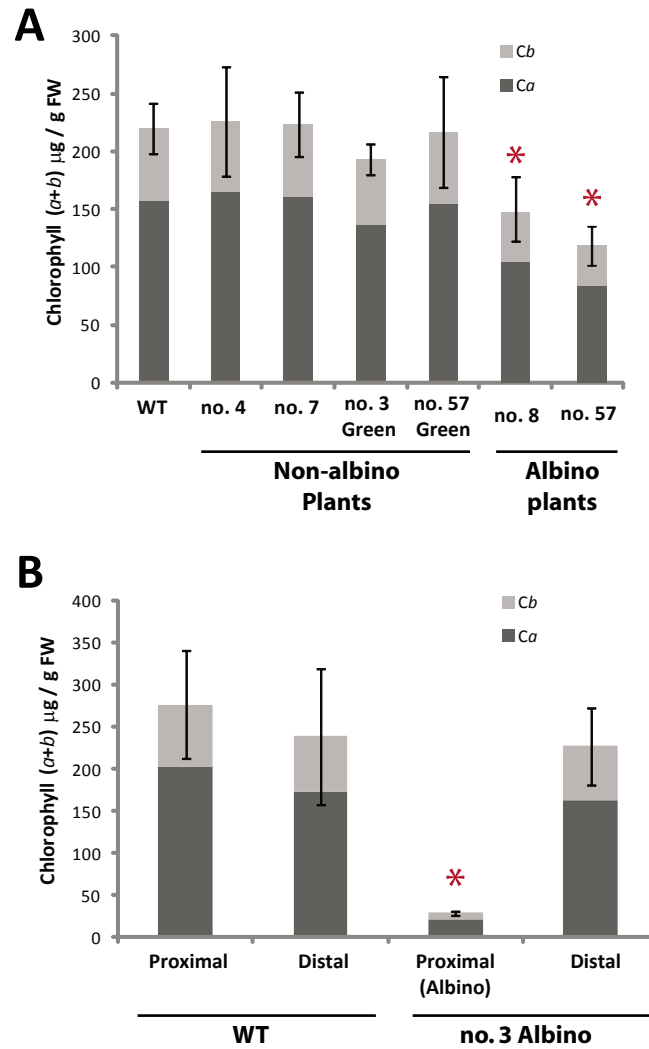

Figure S3. Chlorophyll a and b contents in rosette leaves of HSP90.5 cosuppression lines. 5-week-old plants were grown at  $110 \mu\text{mol.m}^2.\text{sec}^{-1}$  with 16/8 hr light/dark cycle. Error bars represent standard deviation with three independent assays. \*denotes significantly different ( $P < 0.05$ ) compared to WT values by student t-test. Ca: Chlorophyll a. Cb: Chlorophyll b.

A, Entire rosette leaves of transgenic plants were analyzed for chlorophyll content.

B, For Wild type (WT) and no. 3 albino plants, the leaves were sectioned into proximal (albino) and distal portions for chlorophyll extraction to differentiate the albinism.

Figure S4.

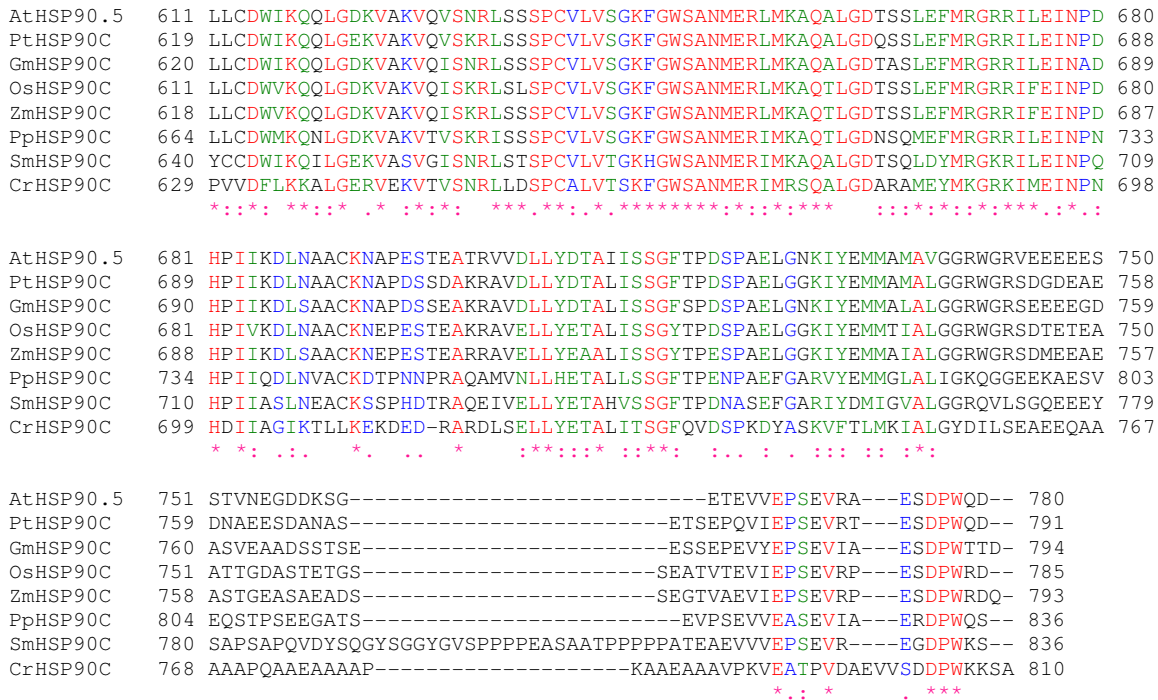

Figure S4. Sequence alignment of the C-terminal fragments of chloroplast HSP90C isoforms from different species.

The alignment was performed using CLUSTALW ([http://npsa-pbil.ibcp.fr/cgi-bin/align\\_clustalw.pl](http://npsa-pbil.ibcp.fr/cgi-bin/align_clustalw.pl)) and only partial C-terminal fragments are shown. The HSP90C isoforms are as following with accession numbers included in the brackets: AtHSP90.5, *Arabidopsis thaliana* HSP90.5 (Q9SIF2); PtHSP90C, *Populus trichocarpa* HSP90C (XP\_002311417); GmHSP90C, *Glycine max* HSP90C (XP\_0035188021); OsHSP90C, *Oryza sativa* HSP90C (B8BC47); ZmHSP90C, *Zea mays* HSP90C (AFW651291); PpHSP90C, *Physcomitrella patens* HSP90C (XP\_0017798941); SmHSP90C, *Selaginella moellendorffii* HSP90C (D8TAK0); CrHSP90C: *Chlamydomonas reinhardtii* HSP90C (Q66T67). The relative positions of the amino acids are also labelled for each isoforms. “\*” represents identical amino acids. “.” and “:” represent weak and strong similarity respectively.
